# Supplementary material for: Micro-tapered aperture nebulization ionization for versatile mass spectrometry analysis
Source: Royal Society of Chemistry journal article supplement (doi:10.1039/d2ay01657e), 2022-01-01
Supplement: d2ay01657e1.pdf [file d2ay01657e1.pdf]

# Electronic Supplementary Information

## *Of*

### Micro-Tapered Aperture Nebulization Ionization for Versatile Mass Spectrometry Analysis

Keguo Teng,<sup>† a</sup> Jianbo Shi,<sup>† b</sup> Yanping Zhu<sup>a</sup>, and Quan Yu<sup>\* a</sup>

<sup>a</sup>. Division of Advanced Manufacturing, Shenzhen International Graduate School, Tsinghua University, Shenzhen, 518055, China.

<sup>b</sup>. Open FIESTA, Shenzhen International Graduate School, Tsinghua University, Shenzhen, 518055, China

\* Corresponding author. E-mail addresses: yu.quan@sz.tsinghua.edu.cn (Q. Yu)

<sup>†</sup> These authors contributed equally to this work

**This PDF file includes:**

**Fig. S1:** Typical mass spectra of 10 µg/mL L-arginine acquired by (a) ESI and (b) MANI.....S2

**Table S1:** MANI-MS results for various analytes..... S2

**Fig. S2:** (a) EIC of L-arginine ion ( $m/z$  175) recorded during a water cleaning process and (b) mass spectrum acquired during the third cleaning step.....S3

**Fig. S3:** The mass spectrum of (a) sibutramine in the weight loss drugs and (b) sildenafil in the aphrodisiac..... S3

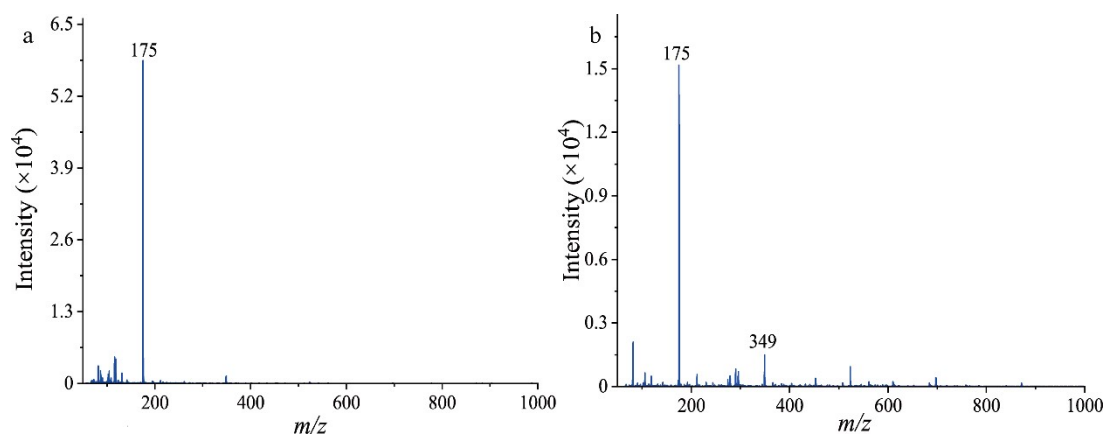

**Fig. S1** Typical mass spectra of 10 µg/mL L-arginine acquired by (a) ESI and (b) MANI.

**Table S1** MANI-MS results for various analytes

| Analyte                            | Concentration<br>(µg mL <sup>-1</sup> ) | Ion mode | Average<br>intensity | MW    | Parent ion (m/z) |
|------------------------------------|-----------------------------------------|----------|----------------------|-------|------------------|
| Dioxopromethazine<br>hydrochloride | 1                                       | Positive | 3.84E4               | 316.4 | 317              |
| L-arginine                         | 10                                      | Positive | 1.12E4               | 174.2 | 175              |
| Aspartame                          | 10                                      | Positive | 3.21E3               | 294.3 | 295              |
| Girard's reagent T                 | 1                                       | Positive | 7.12E3               | 167.6 | 132              |
| Caffeine                           | 10                                      | Positive | 5.12E3               | 194.1 | 195              |
| Reserpine                          | 10                                      | Positive | 3.77E3               | 608.6 | 609              |
| Repaglinide                        | 10                                      | Positive | 3.48E3               | 452.5 | 453              |
| Pioglitazone                       | 10                                      | Positive | 1.45E4               | 356.4 | 357              |
| Metformin                          | 10                                      | Positive | 4.11E3               | 129.1 | 130              |
| Ciprofloxacin                      | 10                                      | Positive | 1.64E4               | 331.3 | 332              |
| Levofloxacin                       | 10                                      | Positive | 5.22E3               | 361.3 | 362              |
| Trinitrotoluene                    | 10                                      | Negative | 5.65E1               | 227.1 | 226              |
| Valproic acid                      | 1                                       | Negative | 3.92E2               | 144.2 | 143              |

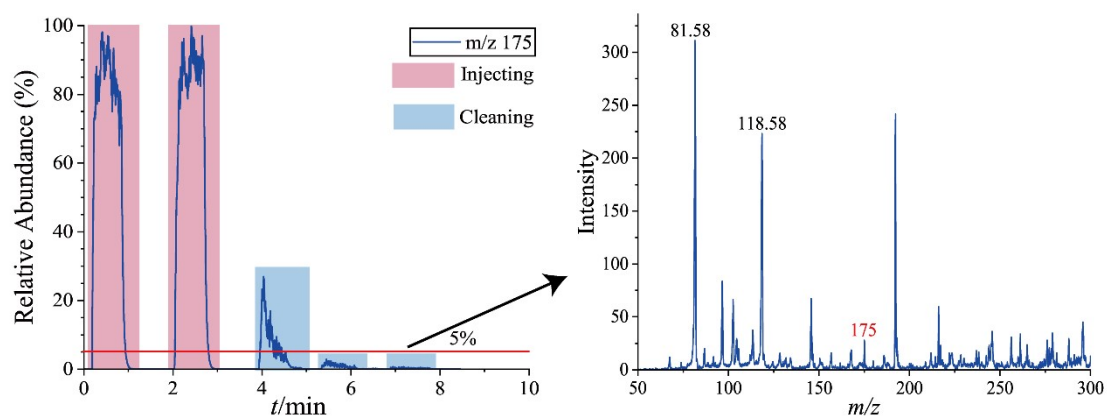

**Fig. S2** (a) EIC of L-arginine ion ( $m/z$  175) recorded during a water cleaning process and (b) mass spectrum acquired during the third cleaning step.

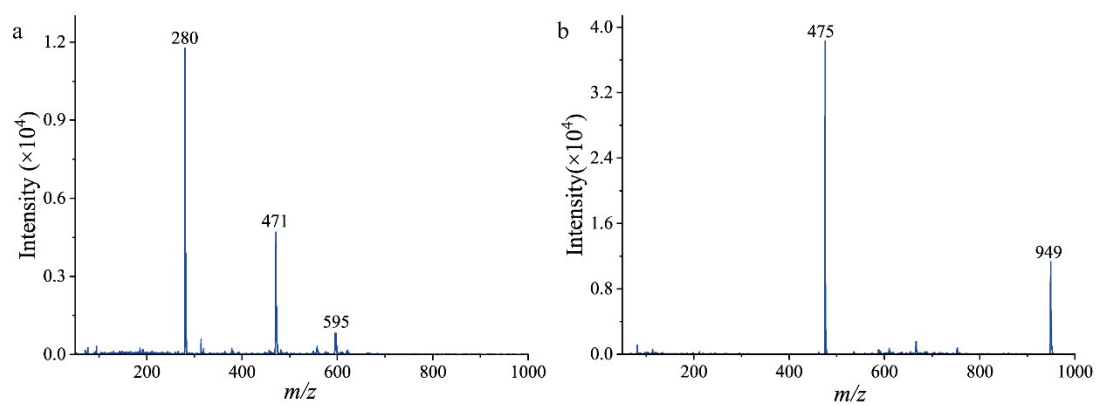

**Fig. S3.** The mass spectrum of (a) sibutramine in the weight loss drugs and (b) sildenafil in the aphrodisiac.
